# Supplementary material
Source: PubMed Central journal article supplement (PMC5148158)
Supplement: NIHMS808608-supplement-ESI.pdf [file NIHMS808608-supplement-ESI.pdf]

# Supplemental information: Regulation of macrophage phenotype and plasticity by complex activation signals

Tim D. Smith, Margaret J. Tse, Elizabeth L. Read, and Wendy F. Liu

We constructed mathematical models comprising minimal nonlinear Ordinary Differential Equation (ODE) networks. Our models were developed from previously described models of T cell subset specialization,<sup>1-3</sup> adding additional connectivities and species to account for the complex kinetics of CD86 and CD206 after stimulation. We constructed 70 models with different topologies. A representative set of the studied topologies, models 1-6, are illustrated in Figure 2 and Supplementary Fig. S4. A model described by the mutual-inhibition self-activation (MISA) motif (Model 2) fits the data better than one in which the M1- and M2-associated pathways are activated independently (Model 1). However, the MISA is nevertheless insufficient to capture the complex kinetics of CD86 and CD206 expression after co-stimulation.

Models that extend the MISA topology by introducing a new species Y that interacts with the M1- and M2-associated pathways, and representing unknown processes downstream of LPS/IFN and/or IL-4/IL-13 signalling events improve the model score (see AICc below) (Models 3, 5, 6). Specifically, we found that an incoherent feed-forward loop on M1, mediated by an additional species Y, was necessary to capture the decay of CD86 expression in costimulated cells at 96 hours.<sup>4</sup> An activating link between Y and M2 was also consistent with the increased expression of CD206 of costimulated cells at later times. In particular, cooperative activation of M2 from Y and M2 improved the overall fit. To discover extended topologies, we were guided by the features of the temporal data and the literature on macrophage activation, as discussed in the main text.

Model quality was assessed based on optimization of parameters by fitting to the 96-hour time course data (Fig. 2) of four timepoints (24, 48, 72, 96 h) for four different stimulation conditions ( $\{0.3,0\}$ ,  $\{0.3,1\}$ ,  $\{0,0\}$ ,  $\{0,1\}$  ng/ml  $\{LPS/IFN-\gamma, IL-4/IL-13\}$ ). The number of replicates was between three and five for each timepoint, giving 72 experimental data points. The error metric used was the sum of squared residuals (RSS) with normalized mean weighting. Parameter estimation was performed by minimizing the RSS of the model predicted CD86 and CD206 values to the normalized mean-weighted experimental values. The Matlab Optimization Toolbox and the trust-region-reflective algorithm were used to perform 1,000 individual fits. Parameters were initialized from a lognormal distribution with a mean and variance of 2, and were constrained to be positive. Parameters were optimized to the normalized timecourse data, and thus are expressed in arbitrary concentration and time units. Initial fits were performed using 400 trust-region-reflective iterations, or until convergence, using normalized unweighted experimental values. A second fit was then performed to the normalized mean-weighted experimental values. All models were assessed using the AICc criterion, a scoring metric for model selection that includes penalties for increasing the number of fitted parameters.<sup>5</sup>

To replicate the cell-to-cell variability in the flow cytometry data, individual cells were given static parameters drawn from a distribution. Cell populations with between 3000 and 10000 cells were simulated, and model parameters for each cell were drawn from a lognormal distribution centered on the optimized parameters and with a variance of one percent of the mean. The resulting CD86 and CD206 expression levels for all models in Figure 2 and fitted parameters (Supplementary Fig. S4) showed single-peaked distributions shifting with dosage, in qualitative agreement with the experimental density plots.

# Supplemental Figures

## Supplementary Figure S1

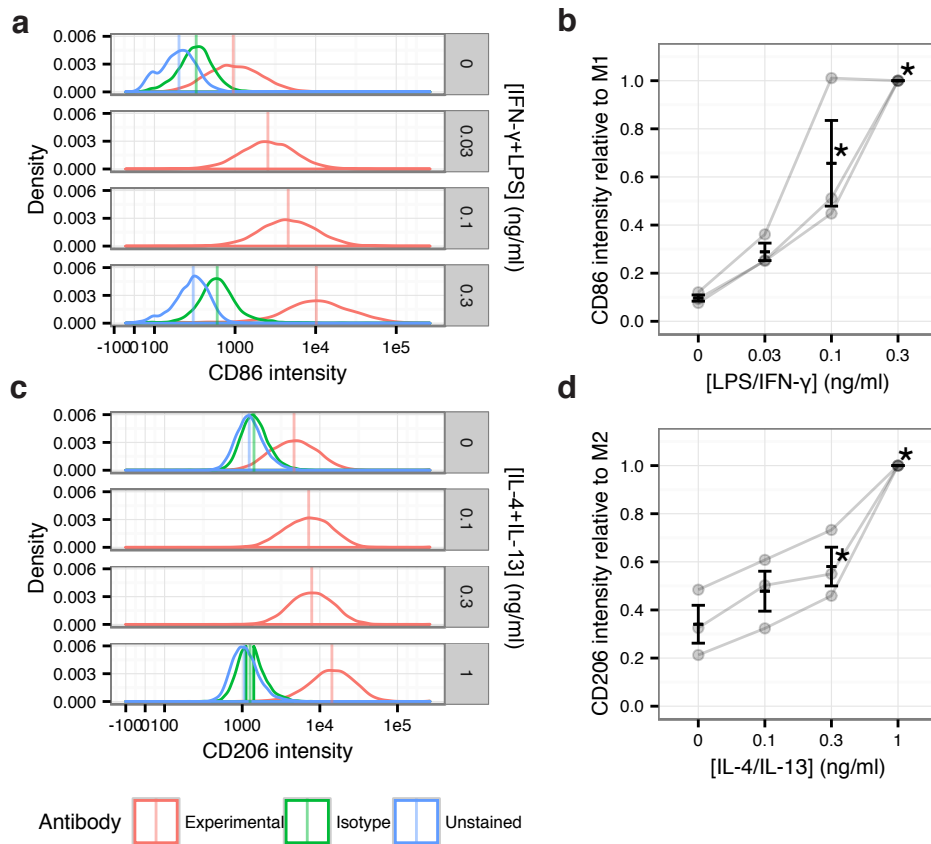

Expression of phenotypic markers CD86 and CD206 in response to LPS/IFN- $\gamma$  and IL-4/IL-13 stimuli is dose-dependent. (A) Representative flow cytometry histograms of CD86 intensity after 48 hours of treatment with indicated dose of LPS/IFN- $\gamma$ . (B) Average median normalized CD86 expression  $\pm$  SEM as a function of increasing LPS/IFN- $\gamma$  dose. Data are normalized to 0.3 ng/ml treatment condition. Asterisk indicates difference vs. untreated,  $p < 0.05$ ;  $n = 3$ . (C) Representative flow cytometry histograms of CD206 intensity after 48 hours of treatment with indicated dose of IL-4/IL-13. (D) Average median normalized CD206 intensity  $\pm$  SEM as a function of increasing IL-4/IL-13 dose. Data are normalized to 1 ng/ml treatment condition. Asterisk indicates difference vs. untreated by two-sided  $t$  test,  $p < 0.05$ ;  $n = 3$ .

## Supplementary Figure S2

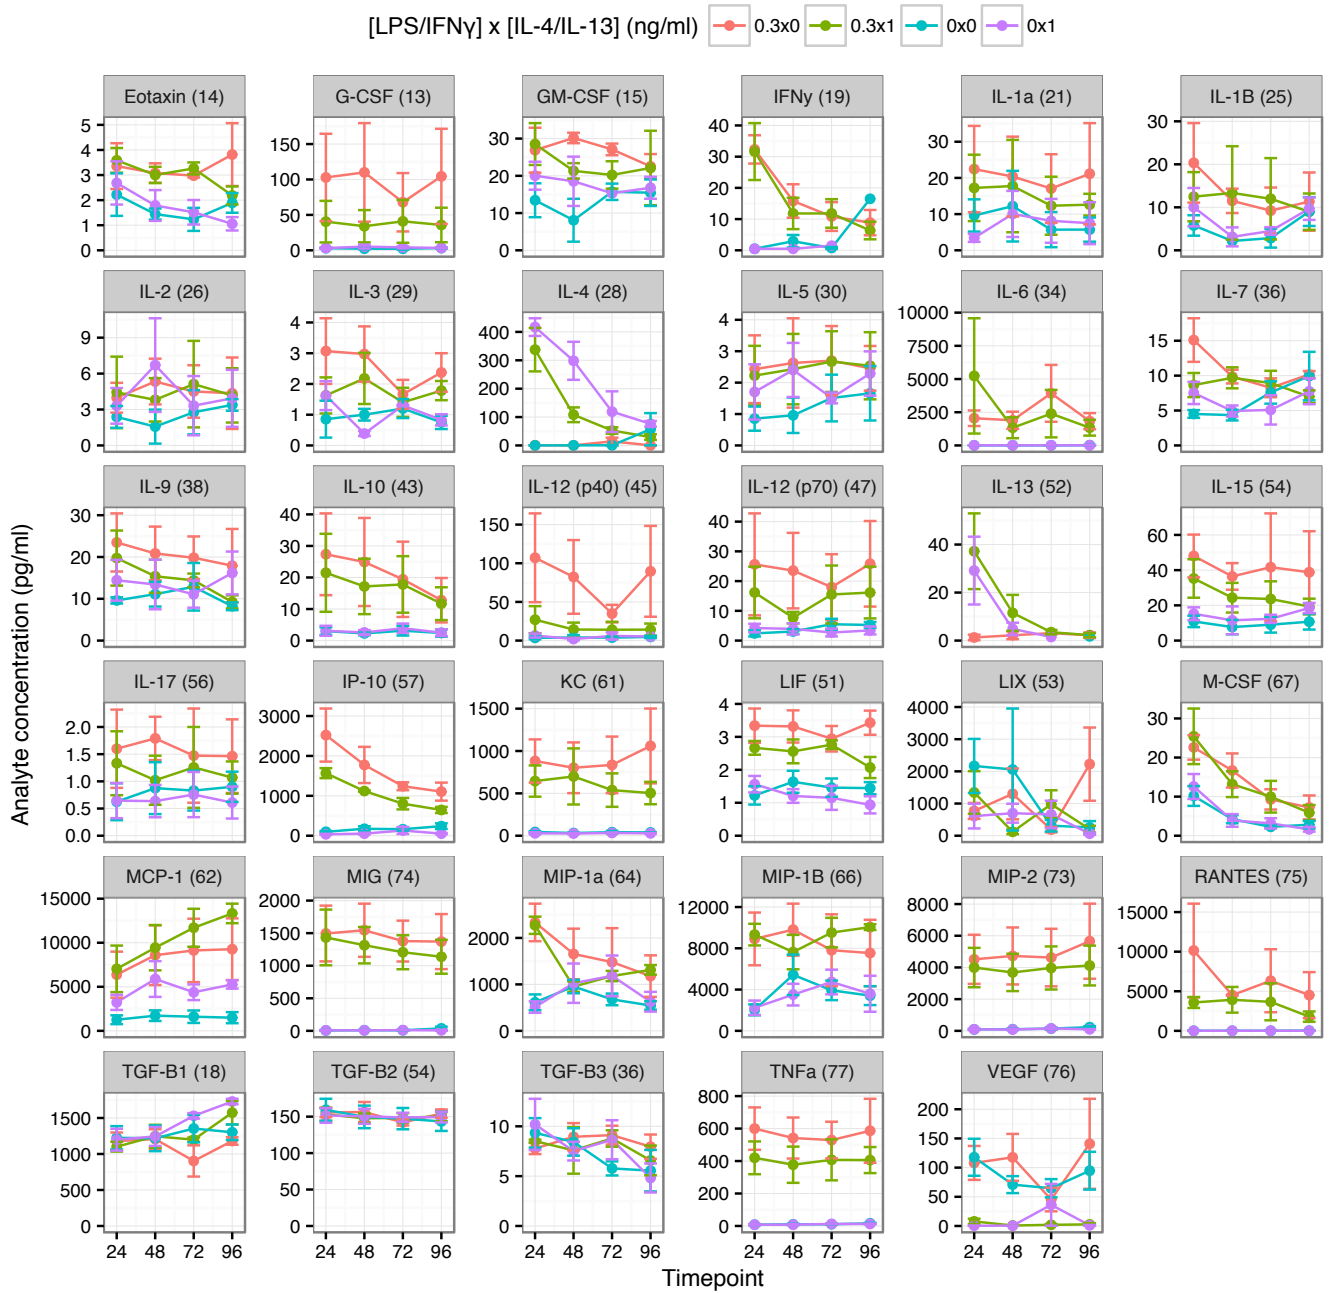

Cytokines present in culture media of macrophages exposed to LPS/IFN- $\gamma$   $\pm$  IL-4/IL-13 for the indicated time in hours, assessed by multiplex ELISA. Data presented as mean  $\pm$  SEM,  $n=3$ .

Supplementary Figure S3

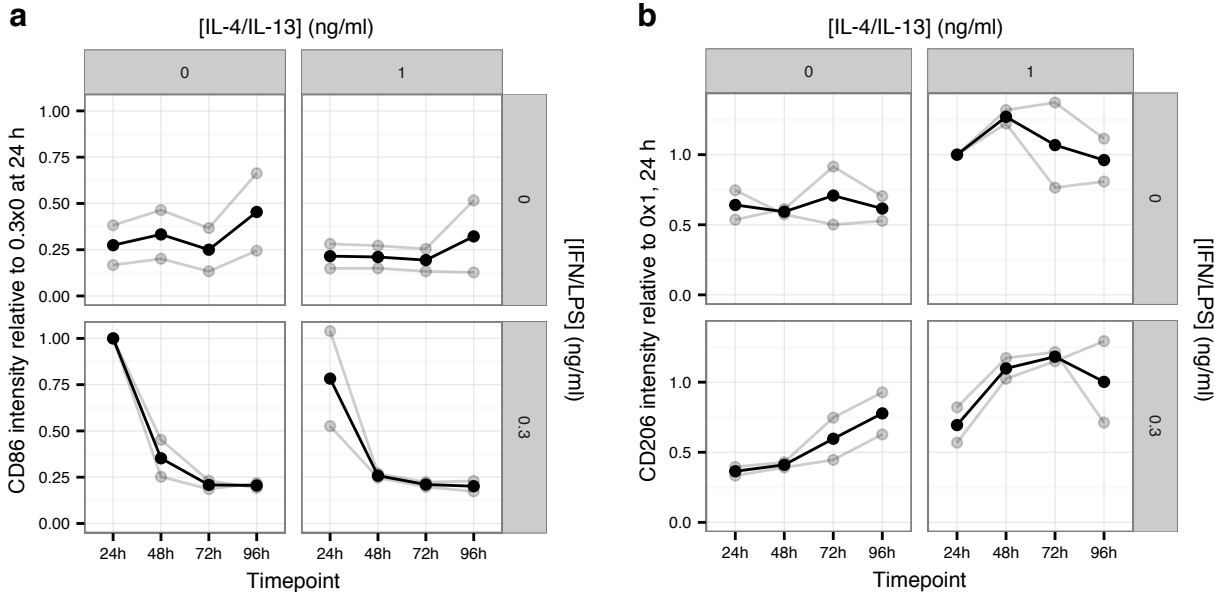

Pulse-chase experiment. Cells were treated with LPS/IFN- $\gamma$  or IL-4/IL-13 at  $t=0$ . Media was replaced with untreated media at  $t=24$  hours. Cells were collected at  $t=24, 48, 72,$  and  $96$  hours for analysis of CD86 and CD206 expression by flow cytometry to observe how marker expression evolved over time in the absence of continued stimulus. Median normalized fluorescence intensity from each experiment ( $n=2$ ) is plotted in gray and the mean is plotted in black.

# Supplementary Figure S4

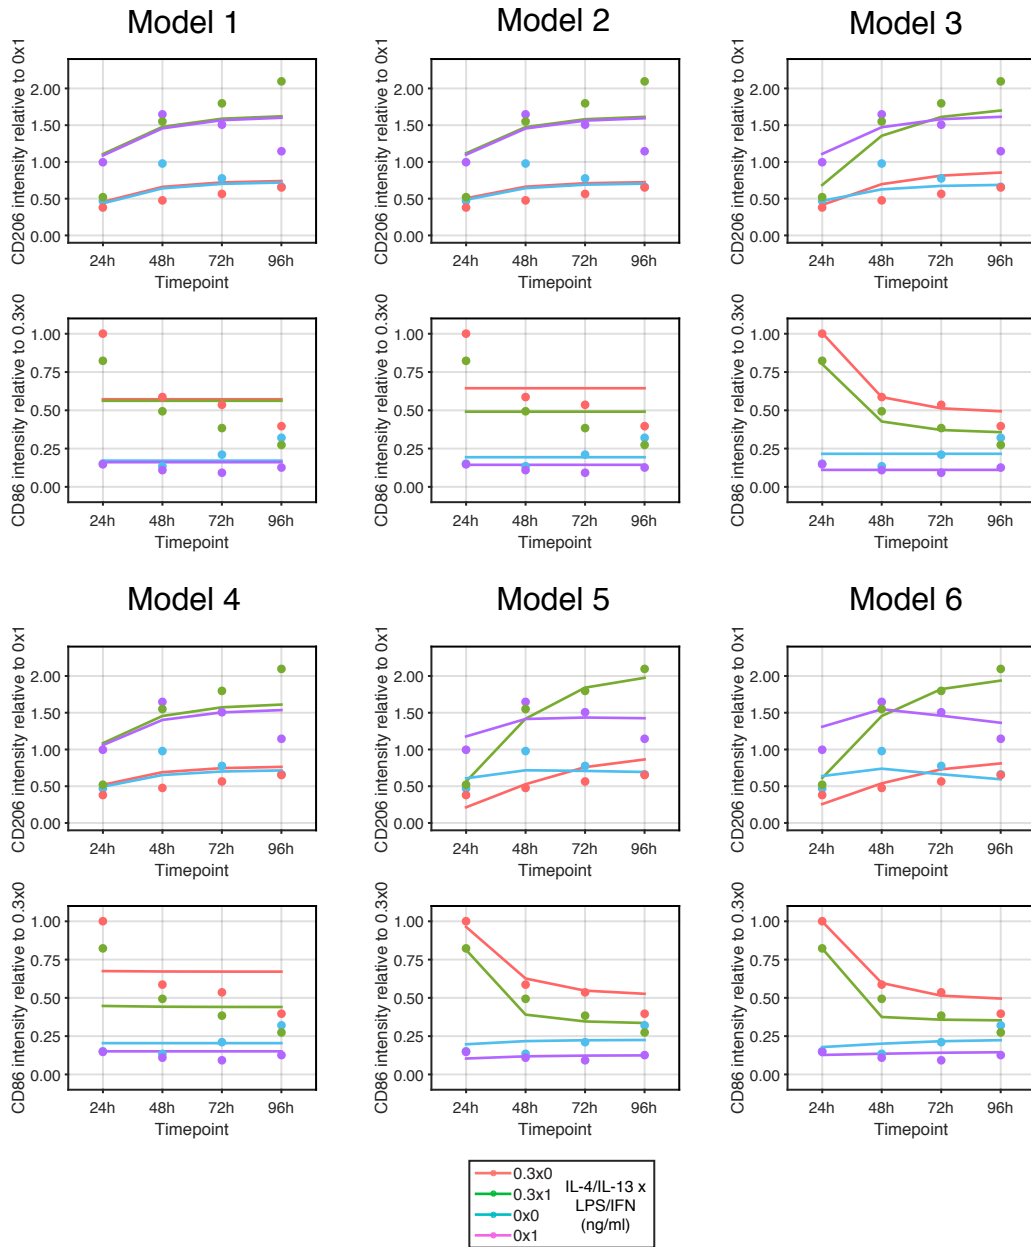

Simulated timecourse experiment from each model shown in Fig. 3. Points mark experimental data, as shown in Fig. 3B.

Supplementary Figure S5

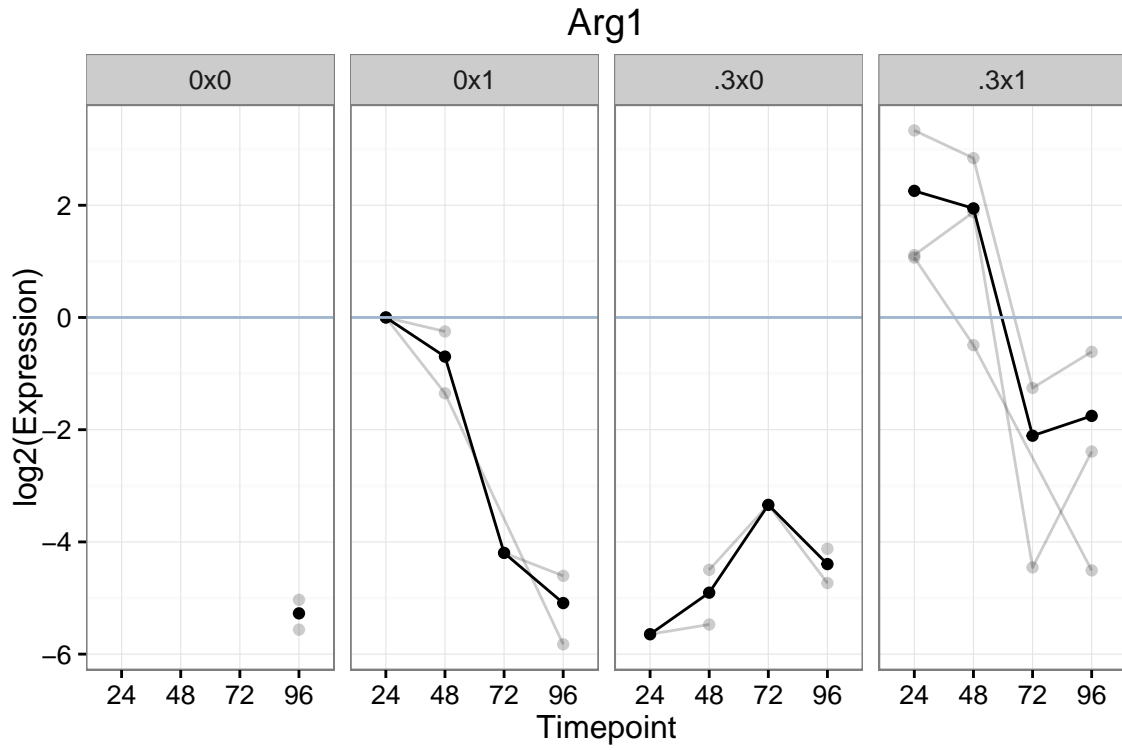

qRT-PCR timecourse data for *Arg1* expression, relative to the IL-4/IL-13-only condition at 24 hours. Gray points are individual observations and gray lines connect points from the same experiment; the black points and line represent the average. Missing points indicate missing data due to signals below limit of quantitation. Headings describe stimulation condition as ng/ml concentration of LPS/IFN- $\gamma$  x IL-4/IL-13. Timepoint is in hours.

## Supplementary Equations

The parameters of these equations are described in Supplementary Table S2 and fitted numeric values are given in Supplementary Table S3.

### Equation S1. Model 1: Self-activation

$$\frac{d[M1]}{dt} = k_1 \frac{S1}{S1 + K_{ind1}} + k_3 \frac{[M1]}{[M1] + K_{act}} + k_5 - d_1 [M1]$$

$$\frac{d[M2]}{dt} = k_2 \frac{S2}{S2 + K_{ind2}} + k_4 \frac{[M2]}{[M2] + K_{act}} + k_6 - d_2 [M2]$$

$$\frac{d[CD86]}{dt} = g_1 [M1] - d_4 [CD86]$$

$$\frac{d[CD206]}{dt} = g_2 [M2] - d_5 [CD206]$$

### Equation S2. Model 2: MISA

$$\frac{d[M1]}{dt} = \frac{k_1 \frac{S1}{S1 + K_{ind1}} + k_3 \frac{[M1]}{[M1] + K_{act}}}{1 + ([M2] / K_{rep2})^n} + k_5 - d_1 [M1]$$

$$\frac{d[M2]}{dt} = \frac{k_2 \frac{S2}{S2 + K_{ind2}} + k_4 \frac{[M2]}{[M2] + K_{act}}}{1 + ([M1] / K_{rep1})^n} + k_6 - d_2 [M2]$$

$$\frac{d[CD86]}{dt} = g_1 [M1] - d_4 [CD86]$$

$$\frac{d[CD206]}{dt} = g_2 [M2] - d_5 [CD206]$$

### Equation S3. Model 3: MISA with IFFL and inhibition between Y and M1

$$\frac{d[M1]}{dt} = \frac{k_1 \frac{S1}{S1 + K_{ind1}} + k_3 \frac{[M1]}{[M1] + K_{act}}}{(1 + ([M2] / K_{rep2})^n) (1 + ([Y] / K_Y)^n)} + k_5 - d_1 [M1]$$

$$\frac{d[M2]}{dt} = \frac{k_2 \frac{S2}{S2 + K_{ind2}} + k_4 \frac{[M2]}{[M2] + K_{act}}}{(1 + ([M1] / K_{rep1})^n)} + k_6 + k_7 \frac{[Y]}{[Y] + K_{CY}} - d_2 [M2]$$

$$\frac{d[Y]}{dt} = k_8 \frac{S1}{S1 + K_{ind1}} - d_3 [Y]$$

$$\frac{d[CD86]}{dt} = g_1 [M1] - d_4 [CD86]$$

$$\frac{d[CD206]}{dt} = g_2 [M2] - d_5 [CD206]$$

**Equation S4. Model 4: MISA with cooperative IFFL**

$$\begin{aligned}\frac{d[M1]}{dt} &= \frac{k_1 \frac{S1}{S1+K_{ind1}} + k_3 \frac{[M1]}{[M1]+K_{act}}}{(1 + ([M2]/K_{rep2})^n)} + k_5 - d_1[M1] \\ \frac{d[M2]}{dt} &= \frac{k_2 \frac{S2}{S2+K_{ind2}} + k_4 \frac{[M2]}{[M2]+K_{act}} + k_7 \frac{[M2][Y]}{(K_{CM2}+[M2])(K_{CY}+[Y])}}{(1 + ([M1]/K_{rep1})^n)} + k_6 - d_2[M2] \\ \frac{d[Y]}{dt} &= k_8 \frac{S1}{S1 + K_{ind1}} - d_3[Y] \\ \frac{d[CD86]}{dt} &= g_1[M1] - d_4[CD86] \\ \frac{d[CD206]}{dt} &= g_2[M2] - d_5[CD206]\end{aligned}$$

**Equation S5. Model 5: MISA with cooperative IFFL and inhibition between Y and M1**

$$\begin{aligned}\frac{d[M1]}{dt} &= \frac{k_1 \frac{S1}{S1+K_{ind1}} + k_3 \frac{[M1]}{[M1]+K_{act}}}{(1 + ([M2]/K_{rep2})^n)(1 + ([Y]/K_Y)^n)} + k_5 - d_1[M1] \\ \frac{d[M2]}{dt} &= \frac{k_2 \frac{S2}{S2+K_{ind2}} + k_4 \frac{[M2]}{[M2]+K_{act}} + k_7 \frac{[M2][Y]}{(K_{CM2}+[M2])(K_{CY}+[Y])}}{(1 + ([M1]/K_{rep1})^n)} + k_6 - d_2[M2] \\ \frac{d[Y]}{dt} &= k_8 \frac{S1}{S1 + K_{ind1}} - d_3[Y] \\ \frac{d[CD86]}{dt} &= g_1[M1] - d_4[CD86] \\ \frac{d[CD206]}{dt} &= g_2[M2] - d_5[CD206]\end{aligned}$$

**Equation S6. Model 6: MISA with cooperative IFFL, inhibition between Y and M1, and inhibition on Y**

$$\begin{aligned}\frac{d[M1]}{dt} &= \frac{k_1 \frac{S1}{S1+K_{ind1}} + k_3 \frac{[M1]}{[M1]+K_{act}}}{(1 + ([M2]/K_{rep2})^n)(1 + ([Y]/K_Y)^n)} + k_5 - d_1[M1] \\ \frac{d[M2]}{dt} &= \frac{k_2 \frac{S2}{S2+K_{ind2}} + k_4 \frac{[M2]}{[M2]+K_{act}} + k_7 \frac{[M2][Y]}{(K_{CM2}+[M2])(K_{CY}+[Y])}}{(1 + ([M1]/K_{rep1})^n)} + k_6 - d_2[M2] \\ \frac{d[Y]}{dt} &= \frac{k_8 \frac{S1}{S1+K_{ind1}}}{1 + (S2/K_{ind2})^n} - d_3[Y] \\ \frac{d[CD86]}{dt} &= g_1[M1] - d_4[CD86] \\ \frac{d[CD206]}{dt} &= g_2[M2] - d_5[CD206]\end{aligned}$$



## Supplementary Tables

**Supplementary Table S1. qPCR primers**

| Gene               | Direction | Sequence                  | Amplicon length (bp) |
|--------------------|-----------|---------------------------|----------------------|
| Arg1               | F         | CTCTGTCTTTTAGGGTTACGG     | 152                  |
|                    | R         | CTCGAGGCTGTCCTTTTGAG      |                      |
| Chi3l3             | F         | AGTGCTGATCTCAATGTGGATTC   | 142                  |
|                    | R         | TAGGGGCACCAATTCCAGTC      |                      |
| Gapdh              | F         | GTCAAGCTCATTTCTGGTATGAC   | 131                  |
|                    | R         | TCTCTTGCTCAGTGTCCCTTGC    |                      |
| Hprt               | F         | TGGACAGGACTGAAAGACTTGCTCG | 81                   |
|                    | R         | CCTTGAGCACACAGAGGGCCAC    |                      |
| Il10               | F         | CCCCTTCCCAGTCGGCCAG       | 300                  |
|                    | R         | GGAGAAATCGATGACAGCGCCTC   |                      |
| Kdm6b              | F         | GGTTCACTTCGGCTCAACTTAG    | 75                   |
|                    | R         | CTCCACCGTATGTTCAACCGC     |                      |
| Ldha <sup>A</sup>  | F         | TGTCTCCAGCAAAGACTACTGT    | 155                  |
|                    | R         | GACTGTACTTGACAATGTTGGGA   |                      |
| Mrc1               | F         | TGTTTTGGTTGGGACTGACC      | 269                  |
|                    | R         | TGCAGTAACTGGTGGATTGTC     |                      |
| mVPA1 <sup>6</sup> | F         | GGAGCCCAGTGTAGAAGAGCA     | 87                   |
|                    | R         | AGCCAGCGAACCATATCCTGA     |                      |
| Nos2               | F         | TTGGGTCTTGTTCACTCCAC      | 211                  |
|                    | R         | TGTATTGTTGGGCTGAGAACAG    |                      |
| Retnla             | F         | GCCAATCCAGCTAACTATCCC     | 187                  |
|                    | R         | AGTCAACGAGTAAGCACAGG      |                      |
| Sdha <sup>B</sup>  | F         | CTTGAATGAGGCTGACTGTG      | 87                   |
|                    | R         | ATCACATAAGCTGGTCCTGT      |                      |
| Tnfa               | F         | CCCACGTCGTAGCAAACCACCA    | 172                  |
|                    | R         | TCGGGGCAGCCTTGTCCCTT      |                      |

<sup>A</sup> RTPrimerDB<sup>7</sup> 3720; <sup>B</sup> RTPrimerDB 3875

**Supplementary Table S2. Model parameters**

| Parameter  | Meaning                                                              |
|------------|----------------------------------------------------------------------|
| $k_1$      | Maximum stimulation rate of M1 cascade under induction with S1       |
| $k_2$      | Maximum stimulation rate of M2 cascade under induction with S2       |
| $k_3$      | Maximum stimulation rate of M1 cascade under self-activation         |
| $k_4$      | Maximum stimulation rate of M2 cascade under self-activation         |
| $k_5$      | Basal rate of M1 activation                                          |
| $k_6$      | Basal rate of M2 activation                                          |
| $k_7$      | Maximum rate of M2 stimulation from Y and M2 cooperative stimulation |
| $k_8$      | Maximum rate of Y production under S1 induction                      |
| $K_Y$      | Level of Y to reach half-maximum inhibition of M1                    |
| $K_{CY}$   | Level of Y to reach half-maximum cooperative activation of M2        |
| $K_{CM2}$  | Level of M2 to reach half-maximum cooperative activation of M2       |
| $K_{rep1}$ | Level of M1 to reach half-maximum inhibition of M2                   |
| $K_{rep2}$ | Level of M2 to reach half-maximum inhibition of M1                   |
| $K_{ind1}$ | Level of S1 to reach half-maximum induction of M1                    |
| $K_{ind2}$ | Level of S2 to reach half-maximum induction of M2                    |
| $K_{act}$  | Level of M1 or M2 to reach half-maximum self-activation              |

| Parameter      | Meaning               |
|----------------|-----------------------|
| d <sub>1</sub> | M1 decay rate         |
| d <sub>2</sub> | M2 decay rate         |
| d <sub>3</sub> | Y decay rate          |
| d <sub>4</sub> | CD86 decay rate       |
| d <sub>5</sub> | CD206 decay rate      |
| g <sub>1</sub> | CD86 production rate  |
| g <sub>2</sub> | CD206 production rate |
| n              | Hill coefficient      |

**Supplementary Table S3. Model parameter values**

| Model               | 1      | 2      | 3      | 4      | 5      | 6      |
|---------------------|--------|--------|--------|--------|--------|--------|
| k <sub>1</sub>      | 0.4341 | 0.5871 | 10.421 | 0.7595 | 2.2698 | 2.8511 |
| k <sub>2</sub>      | 1.1124 | 1.6691 | 1.4815 | 1.4998 | 0.8939 | 1.0146 |
| k <sub>3</sub>      | 0.8322 | 0.791  | 1.0512 | 0.6856 | 1.1102 | 0.7833 |
| k <sub>4</sub>      | 1.6865 | 0.311  | 0.9216 | 0.4332 | 1.5412 | 1.1121 |
| k <sub>5</sub>      | 0.0456 | 0.0679 | 0.0421 | 0.0968 | 0.0332 | 0.1067 |
| k <sub>6</sub>      | 0.0172 | 0.5813 | 0.3239 | 0.541  | 0.0831 | 0.1589 |
| k <sub>7</sub>      | N/A    | N/A    | 0.1977 | 4.3814 | 2.8281 | 2.2411 |
| k <sub>8</sub>      | N/A    | N/A    | 0.1096 | 0.1594 | 0.7288 | 0.1206 |
| K <sub>M2</sub>     | N/A    | N/A    | N/A    | 9.9178 | 1.3292 | 0.0012 |
| K <sub>CY</sub>     | N/A    | N/A    | 0.3438 | 8.4118 | 5.4604 | 5.4965 |
| K <sub>Y</sub>      | N/A    | N/A    | N/A    | N/A    | 0.0209 | 0.9182 |
| K <sub>rep1</sub>   | N/A    | 2.8882 | 2.2441 | 1.9004 | 2.4051 | 1.0306 |
| K <sub>rep2</sub>   | N/A    | 14.228 | 1.4216 | 2.0858 | 1.0162 | 1.195  |
| K <sub>ind1</sub> * | 1      | 1      | 1      | 1      | 1      | 1      |
| K <sub>ind2</sub> * | 0.3    | 0.3    | 0.3    | 0.3    | 0.3    | 0.3    |
| K <sub>act</sub> *  | 1      | 1      | 1      | 1      | 1      | 1      |
| d <sub>1</sub> *    | 1      | 1      | 1      | 1      | 1      | 1      |
| d <sub>2</sub> *    | 1      | 1      | 1      | 1      | 1      | 1      |
| d <sub>3</sub> *    | N/A    | N/A    | 0.05   | 0.05   | 0.05   | 0.05   |
| d <sub>4</sub> *    | 0.05   | 0.05   | 0.05   | 0.05   | 0.05   | 0.05   |
| d <sub>5</sub> *    | 0.05   | 0.05   | 0.05   | 0.05   | 0.05   | 0.05   |
| g <sub>1</sub> *    | 1      | 1      | 1      | 1      | 1      | 1      |
| g <sub>2</sub> *    | 1      | 1      | 1      | 1      | 1      | 1      |
| n                   | N/A    | 2      | N/A    | 2      | 2      | 2      |
| Free parameters     | 6      | 8      | 11     | 12     | 13     | 13     |

Representative best fit parameter values for each model from optimization. Parameters are in arbitrary units of concentration and time, relative to the rate of degradation of the M1 species (d<sub>1</sub>), which is approximated to be 1 [1/hr] according to the half-life of STAT1.<sup>8</sup> The parameters were optimized to normalized CD86 and CD206 expression levels. Parameters with an asterisk were fixed to constrain parameter space during optimization. Fixed values were chosen based on initial parameter searches. Alternative constraints yielded different quantitative values, but the same ordering of model scores according to the AICc. The threshold parameters for induction, K<sub>ind1</sub> and K<sub>ind2</sub> are based on the dose-response of CD86 and CD206 under the single-stimulus conditions. K<sub>act</sub> is approximated from the experimental data condition with no induction stimulus at 24 hours. A Hill coefficient of 2 was used for all parameter sets. Parameter sets estimated using a Hill coefficient of 1 produced AICc scores equivalent or worse than the AICc scores using a Hill coefficient of 2.

## References

1. Mariani, L., Löhning, M., Radbruch, A. & Höfer, T. Transcriptional control networks of cell differentiation: insights from helper T lymphocytes. *Prog. Biophys. Mol. Biol.* **86**, 45–76 (2004).
2. Hong, T., Xing, J., Li, L. & Tyson, J. J. A simple theoretical framework for understanding heterogeneous differentiation of CD4+ T cells. *BMC Syst Biol* **6**, 66 (2012).
3. Antebi, Y. E. *et al.* Mapping differentiation under mixed culture conditions reveals a tunable continuum of T cell fates. *PLoS Biol.* **11**, e1001616 (2013).
4. Alon, U. *An introduction to systems biology: design principles of biological circuits.* (Chapman & Hall/CRC, 2007).
5. Nelder, J. A. & Mead, R. A Simplex Method for Function Minimization. *The Computer Journal* **7**, 308–313 (1965).
6. Laurell, H. *et al.* Correction of RT-qPCR data for genomic DNA-derived signals with ValidPrime. *Nucleic acids research* **40**, e51–e51 (2012).
7. Lefever, S., Vandesompele, J., Speleman, F. & Pattyn, F. RTPrimerDB: the portal for real-time PCR primers and probes. *Nucleic Acids Res.* **37**, D942–945 (2009).
8. Legewie, S., Herzog, H., Westerhoff, H. V. & Blüthgen, N. Recurrent design patterns in the feedback regulation of the mammalian signalling network. *Mol. Syst. Biol.* **4**, 190 (2008).
